## Volume 3 Summer Issue

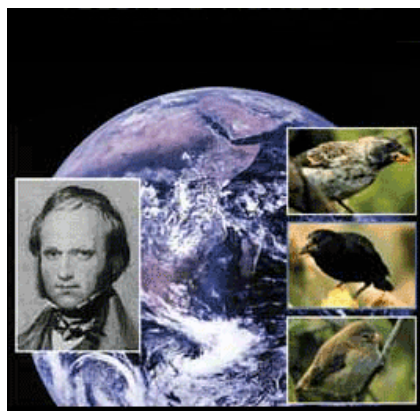

### Table of Contents

Use Arrows to Browse  
Previous Issues

#### Contact CBE

8120 Woodmont Avenue Suite  
750  
Bethesda, Maryland 20814-  
2762  
Phone: (301) 347-9300  
Fax: (301) 347-9350  
cbe@ascb.org

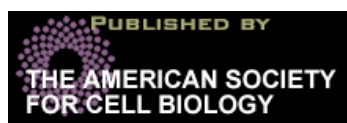

[Editorial Board Member Login](#)

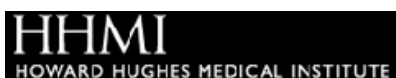

Supported in part by an  
Undergraduate Science  
Education Program  
grant from the

## ESSAY

- **A Hierarchical Biology Concept Framework: A Tool for Course Design**  
by Julia Khodor, Dina Gould Halme, and Graham C. Walker

## ARTICLES

- **An Approach to Improving Science Knowledge About Energy Balance and Nutrition Among Elementary- and Middle-School Students**  
by Nancy P. Moreno, James P. Denk, J. Kyle Roberts, Barbara Z. Tharp, Michelle Bost, and William A. Thomson
- **Teaching Cell Biology to Nonscience Majors Through Forensics, or How to Design a Killer Course**  
by Laura Arwood

## ANNOUNCEMENTS

- **BioEd 2004: Biology, Sustainable Development, Ethics and Citizenship**  
by

## FEATURES

- **Approaches to Biology Teaching and Learning: From Assays to Assessments—On Collecting Evidence in Science Teaching**  
by Kimberly Tanner and Deborah Allen
- **From the National Academies: Teaching the Science of Evolution**  
by Bruce Alberts and Jay B. Labov
- **Video Views and Reviews: Mitosis, Microfibers, and Motility**  
by Christopher Watters

## POINTS OF VIEW

- **The Interface of Mathematics and Biology**  
by Louis J. Gross, Roger Brent, and Ron Hoy

## ESSAY

- **Approaches to Cell Biology: Developing Educational Multimedia**  
by Robin J. Heyden
- **Microscopy Images as Interactive Tools in Cell Modeling and Cell Biology Education**  
by Tania C. Araújo-Jorge, Tania S. Cardona, Cláudia L.S. Mendes, Andrea Henriques-Pons, Rosane M.S. Meirelles, Cláudia M.L.M. Coutinho, Luiz Edmundo V. Aguiar, Maria de Nazareth L. Meirelles, Solange L. de Castro, Helene S. Barbosa, and Mauricio R.M.P. Luz

## ANNOUNCEMENTS

---

September 3–7, 2005, Sydney, Australia

### 15th International Society of Developmental Biologists Congress

#### Submit Your Manuscript

Online Manuscript Submission

- **Instructions to Authors**
- **Top Ten Reasons to Publish in CBE** [pdf]

#### Other Information:

There are **6,450** registered users signed up to receive quarterly notification of new content.

[Become a registered user.](#)

#### Order a Free CBE Poster

#### On the Cover [\[Printable Cover\]](#)

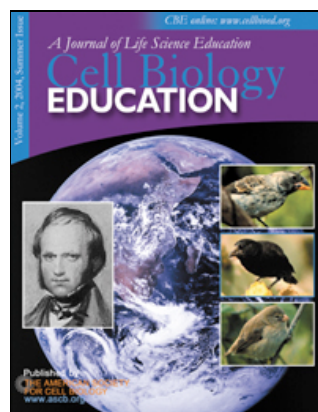

Charles Darwin was a 19<sup>th</sup> Century life scientist and explorer and author of the book, *On the Origin of Species*. Darwin developed theories about evolution while studying many species, most famously the finches, on the Galapagos Islands. Darwin catalogued many different shapes of finch beaks, which revealed much about the evolutionary process. The cover highlights the Feature "From the National Academies," which describes resources from the National Academies for teaching evolution. [Background image supplied by NASA and the NSSDC. Charles Darwin in 1840. Watercolor by George Richmond. Finch images reproduced with permission from Dr. Robert H. Rothman, <http://www.rit.edu/~rhrsbi/GalapagosPages/DarwinFinch.html>.]
